# Supplementary material
Source: PubMed Central journal article supplement (PMC11028649)
Supplement: 262_2016_1928_MOESM1_ESM.pdf [file 262_2016_1928_MOESM1_ESM.pdf]

**Supplementary table 1. Primers used for vector construction.**

| Name   | Sequence                                                        |
|--------|-----------------------------------------------------------------|
| DTT-F  | <b>CGCGGATCCGATGATGATGATAAGATAAAATCTTGATTGGGATG</b><br>TCATAAGG |
| DTT-R  | CAAGTAGTTCATAATTCGTATAATCGTCCCGGTCAGAACCACCA<br>CGAGGTTGT       |
| VEGF-F | CAAGTAGTTCATAATTCGTATAATCGTCCCGGTCAGAACCACCA<br>CGAGGTTGT       |
| VEGF-R | <u>CCGCTCGAGCTAATCTTTCTTCGGACGGCATTGCACTTGT</u> TGT             |

In DTT-F, *Bam*H I site is underlined and **Asp-Asp-Asp-Asp-Lys (DDDDK)** coding sequence is in bold case.

In VEGF-R, *Xho* I site is underlined

a

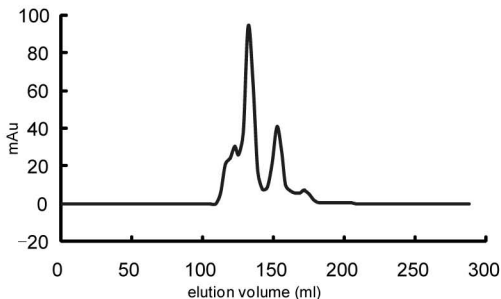

b

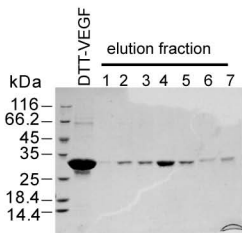

c

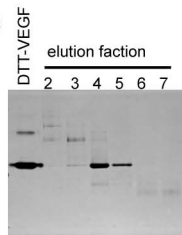

**Supplementary figure 1. DTT-VEGF proteins are heterogeneous.** (a) Superdex G-75 gel chromatography profile of purified DTT-VEGF. (b) SDS-PAGE analysis of elution fractions collected from Superdex G-75 gel column. Elution fractions (10 ml per fraction) were collected from 110 to 180 ml of the elution volume. (c) Native-PAGE analysis of the elution fractions.

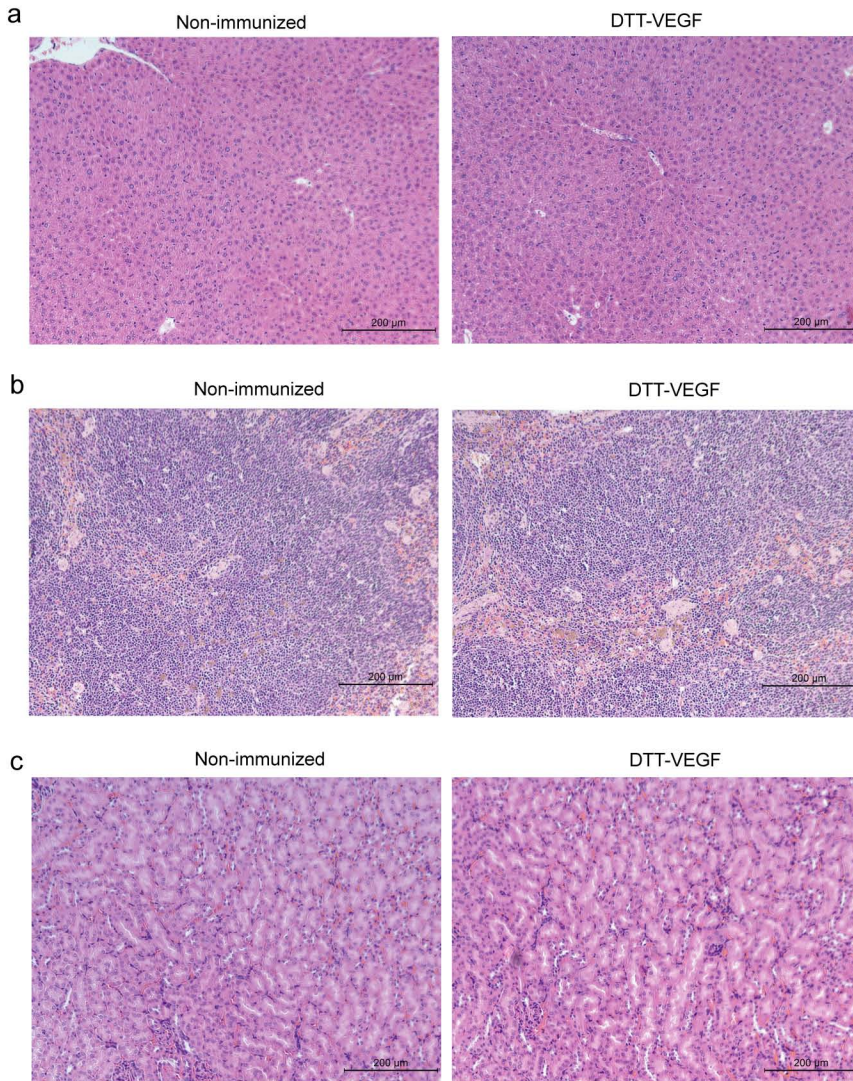

**Supplementary figure 2. Lack of tissue damage in mice immunized with DTT-VEGF**  
C57BL/6 mice were immunized with DTT-VEGF three times at 2 week intervals. Non-immunized mice were used as control. Liver (a), spleen (b) and kidney (c) were excised from mice one week after the last immunization, sectioned and evaluated by H&E staining (Magnification  $\times 100$ ).

Supplementary Figure 3

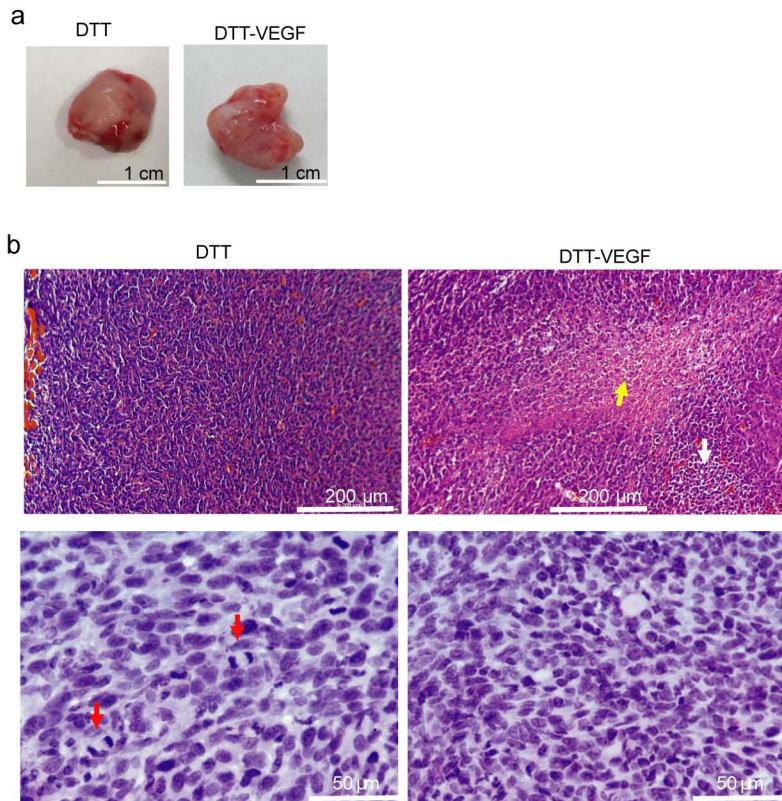

**Supplementary figure 3. DTT-VEGF immunization induces tumor necrosis.** BALB/c mice (n = 4) were immunized 3 times with DTT-VEGF or DTT at 2 week intervals. Immunized mice were subcutaneously injected with  $3 \times 10^5$  CT26 tumor cells one week after second immunization. Tumors were excised when the diameters reached 1 cm (**a**) (DTT-VEGF group was collected at day 21, DTT group was collected at day 14) for H&E staining (**b**). Yellow arrow indicates the necrosis. White arrow shows the lymphocytes infiltration. Red arrows show the tumor cells mitosis.
